# Supplementary material for: Enhanced Thermostability of Pseudomonas nitroreducens Isoeugenol Monooxygenase by the Combinatorial Strategy of Surface Residue Replacement and Consensus Mutagenesis
Source: MDPI journal article supplement (doi:10.3390/catal11101199), 2021-09-30
Supplement: s1 [file s1]

## Catalysts

### **Enhanced Thermostability of *Pseudomonas nitroreducens* Isoeugenol Monooxygenase by the Combinatorial Strategy of Surface Residue Replacement and Consensus Mutagenesis**

**Xinyi Lu<sup>1</sup>, Xiaomei Wu<sup>1</sup>, Baodi Ma<sup>1\*</sup>, Yi Xu<sup>1\*</sup>**

*<sup>1</sup>School of Chemical and Environmental Engineering, Shanghai Institute of Technology,  
100 Haiquan Road, Shanghai 201418, China*

**To whom correspondence should be addressed:**

**Baodi Ma:** [mbd2966@sit.edu.cn](mailto:mbd2966@sit.edu.cn)

**Yi Xu:** [xuyi@sit.edu.cn](mailto:xuyi@sit.edu.cn)

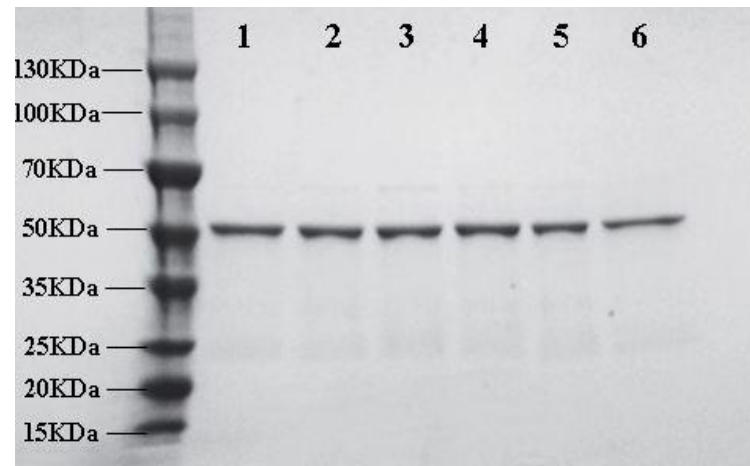

**Figure S1.** SDS-PAGE assay of purified IEM and its mutants. Lane 1: Wild-type IEM; Lane 2: mutant K83R; Lane 3: mutant K95R; Lane 4: mutant L273F; Lane 5: K83R/K95R; Lane 6: K83R/K95R/L273F.

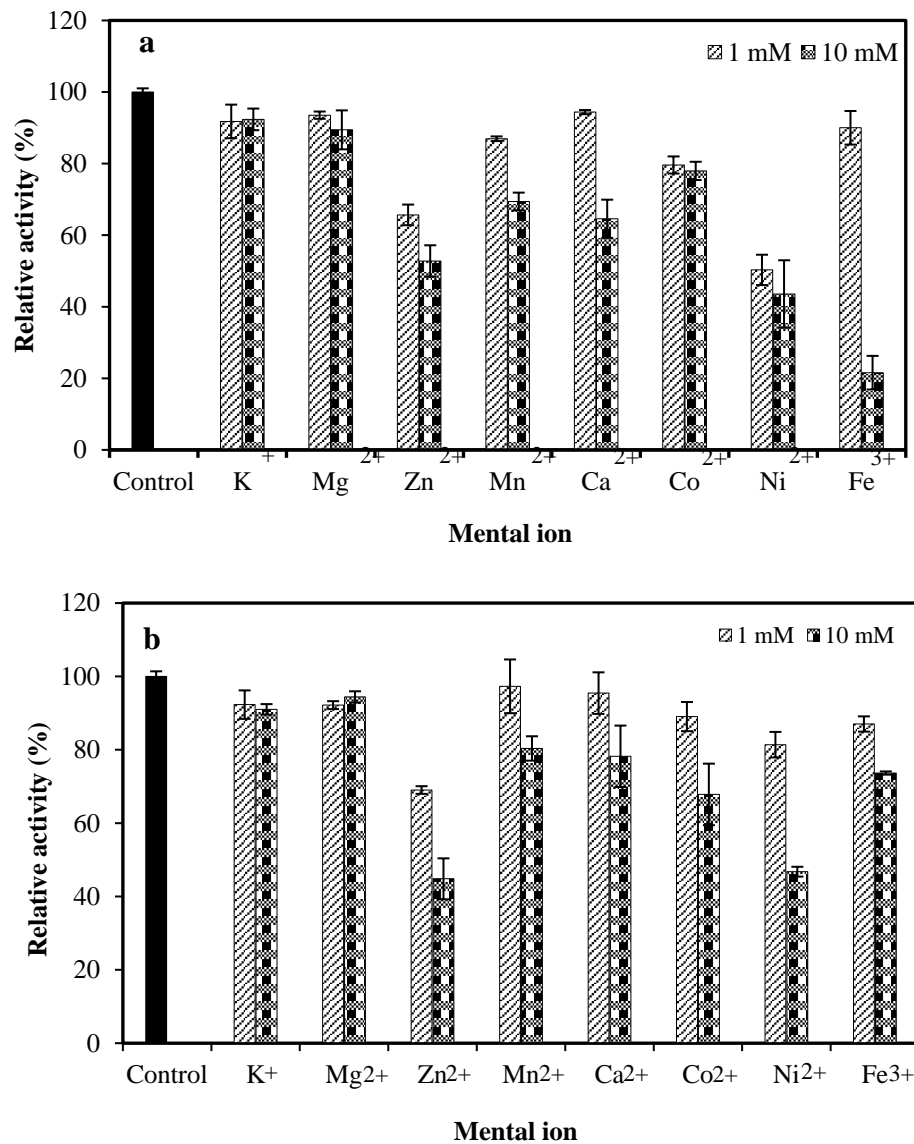

**Figure S2.** The effects of metal ions on IEM and K83R/K95R/L273F activities. (a) Wild-type; (b) mutant K83R/K95R/L273F. The enzyme activity was measured in the presence of 1 mM and 10 mM metal ions. The control represented the reaction without any metal ions.

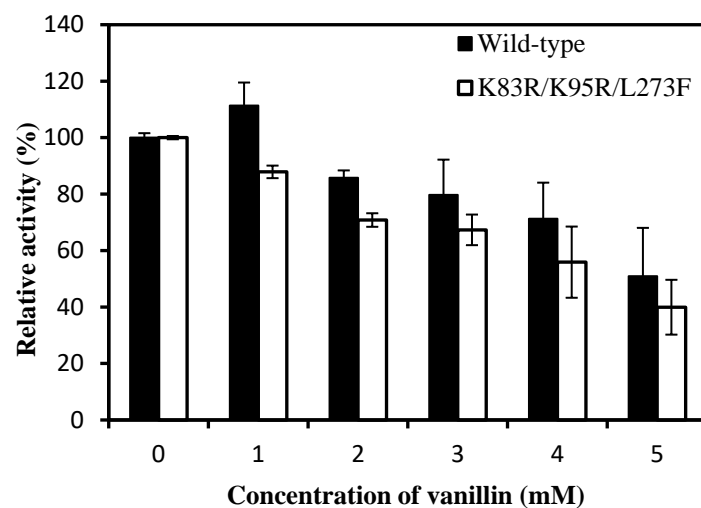

**Figure S3.** The effects of product-inhibition on IEM and K83R/K95R/L273F activities. The enzyme activity was measured in the presence of 1 mM to 5 mM vanillin. The control represented the reaction without vanillin.

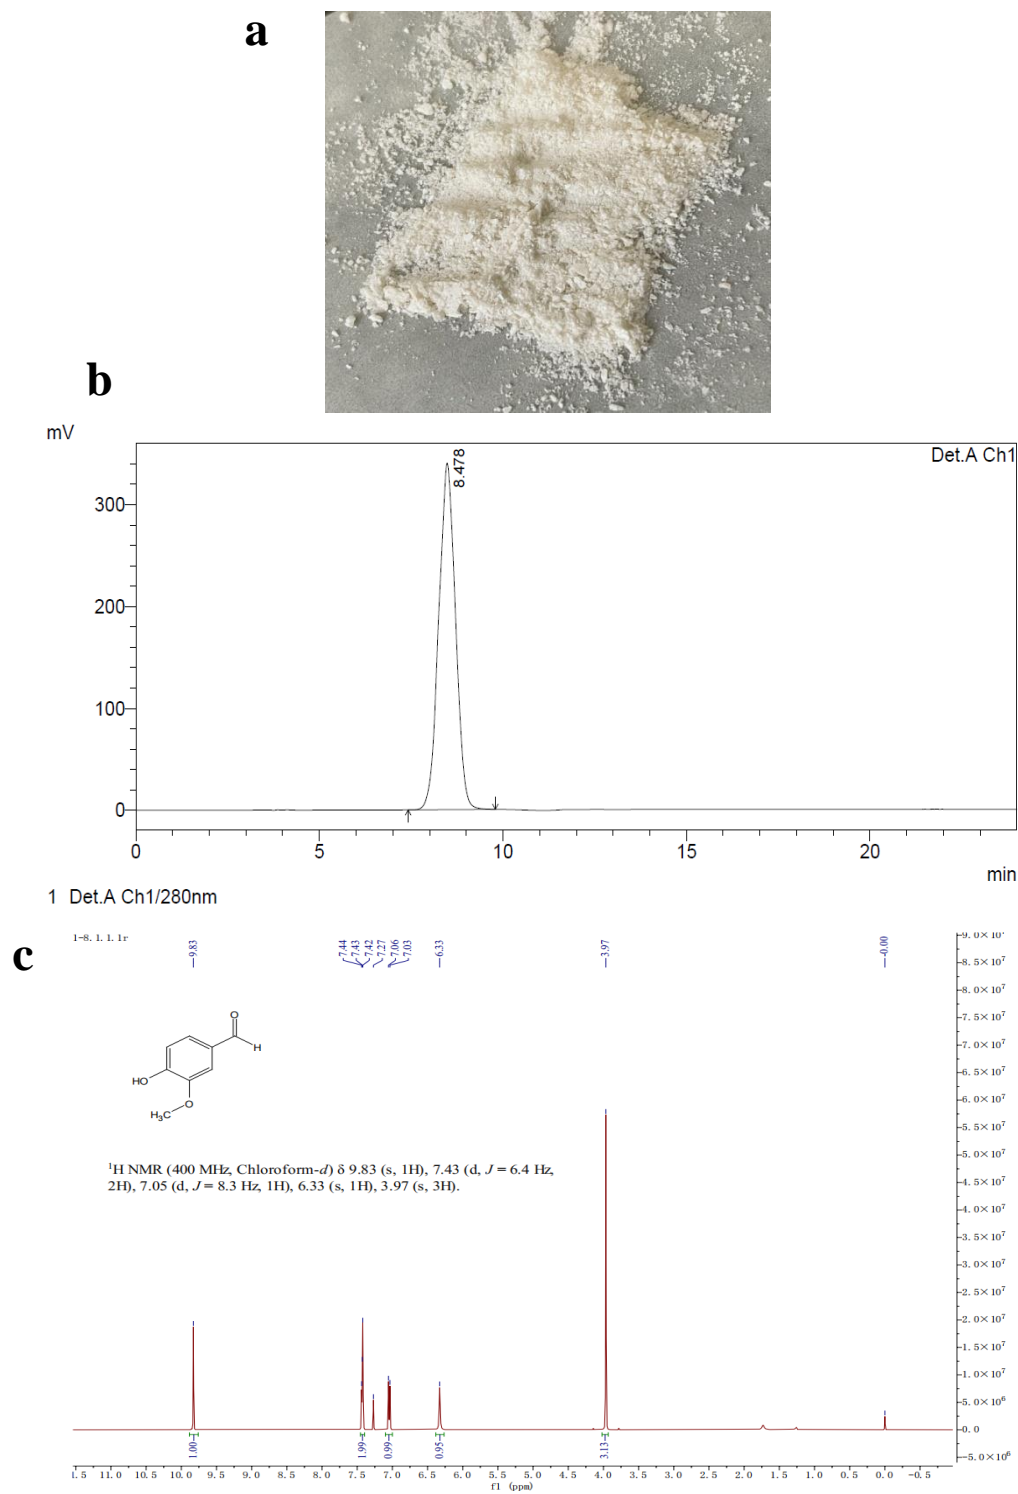

**Figure S4.** Preparation of natural vanillin. **(a)** The morphology of prepared vanillin; **(b)** HPLC spectrum; **(c)**  $^1\text{H}$  NMR spectrum.

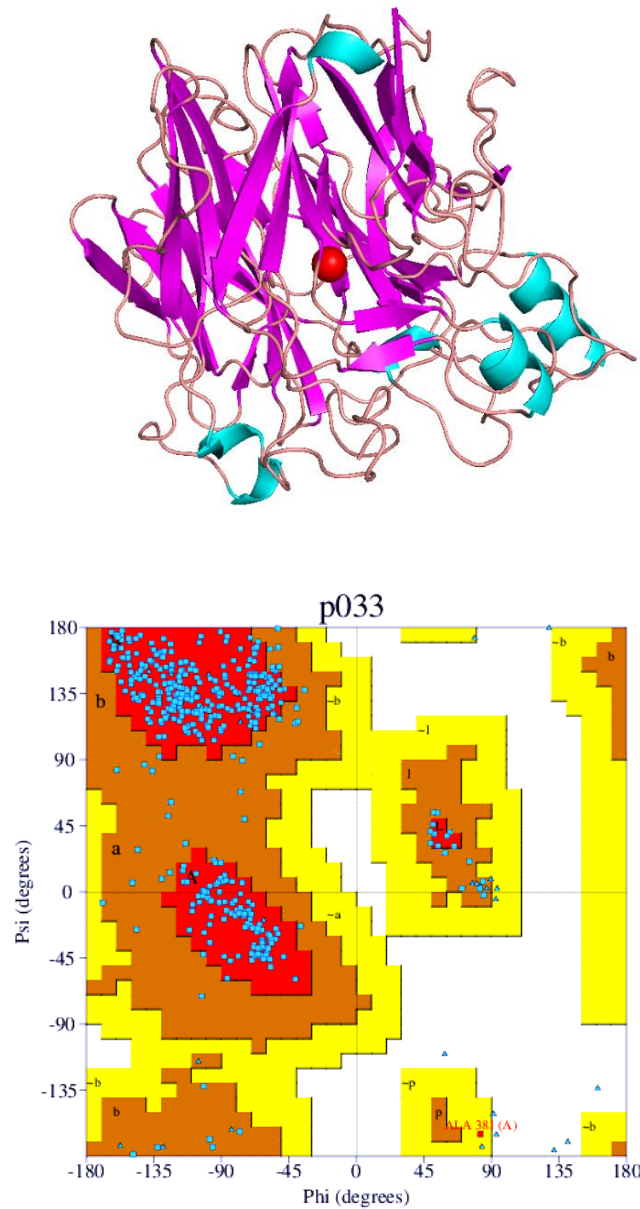

**Figure S5.** The 3D structure of IEM based on Homology Modeling and qualified by Ramachandran plot. The results showed that 88.6% residues were located in the most favoured regions, 11.4% residues in allowed regions and no residue in disallowed regions. Besides, the model was also qualified as “Pass” by VERIFY 3D for that at least 88.25% of the residues had average 3D-1D score  $\geq 0.2$ .

**Table S1.** The comparison of the enzyme activity and residual activity after 35 °C heat-treatment between IEM and mutants.

| Strategy                    | Mutants | Relative activity<br>(%) | Residual activity<br>(%) |
|-----------------------------|---------|--------------------------|--------------------------|
| -                           | IEM     | 100.0±8.0                | 53.2±2.4                 |
| Surface residue replacement | G31A    | 10.7±0.1                 | 50.8±1.2                 |
|                             | G113A   | 19.4±1.1                 | 13.2±5.4                 |
|                             | G128A   | 65.3±3.0                 | 7.7±0.1                  |
|                             | G157A   | 61.9±0.2                 | 8.6±0.3                  |
|                             | G290A   | 80.0±1.6                 | 30.9±1.1                 |
|                             | G398A   | 130.4±1.5                | 55.6±1.5                 |
|                             | K35R    | 76.7±0.9                 | 46.0±0.2                 |
|                             | K54R    | 78.5±0.5                 | 34.5±1.6                 |
|                             | K83R    | 103.9±3.8                | 84.2±2.7                 |
|                             | K95R    | 106.6±3.7                | 68.0±0.4                 |
|                             | K112R   | 113.5±0.7                | 53.8±1.1                 |
|                             | K185R   | 70.4±1.1                 | 23.7±0.1                 |
|                             | K199R   | 115.2±0.4                | 48.1±0.4                 |
|                             | K202R   | 71.2±1.9                 | 40.7±0.4                 |
|                             | K242R   | 94.5±0.8                 | 30.3±0.7                 |
|                             | K244R   | 104.6±2.9                | 55.8±0.7                 |
|                             | K274R   | 94.5±0.3                 | 56.2±1.0                 |
|                             | K319R   | 90.0±2.3                 | 37.7±1.4                 |
|                             | K339R   | 82.1±0.4                 | 39.2±2.0                 |
|                             | K383R   | 99.5±0.3                 | 35.1±0.8                 |
| Consensus mutagenesis       | V130L   | 71.5±1.4                 | 48.8±1.0                 |
|                             | S182Y   | ND                       | ND                       |
|                             | L303N   | ND                       | ND                       |
|                             | I352R   | 99.7±1.3                 | 70.4±2.4                 |
|                             | D176E   | 95.8±1.5                 | 43.0±1.2                 |
|                             | N312G   | 81.3±4.0                 | 53.3±1.7                 |
|                             | F216M   | 73.9±0.6                 | 49.1±1.4                 |
|                             | L273F   | 117.2±0.6                | 50.4±0.6                 |
|                             | E47D    | ND                       | ND                       |

\*ND: enzyme activity was not detectable.

**Table S2.** Primers for site-directed mutagenesis.

| Primers | Sequences (5'→3')                           | Length<br>(bp) | T <sub>m</sub><br>(°C) |
|---------|---------------------------------------------|----------------|------------------------|
| G31A-F  | GATCTAGAGGTTGAC <u>GCT</u> GAAATCCCAAATC    | 32             | 64.09                  |
| G31A-R  | GATTTTGGGATTTCA <u>GCGT</u> CAACCTCTAGATC   | 32             | 64.09                  |
| G113A-F | GACACCAGTGTAAGCTCTAGACCGCACCGTTG            | 34             | 68.96                  |
| G113A-R | CAACGGTGCGGTCTAG <u>AGCT</u> TTTACACTGGTGTC | 34             | 68.96                  |
| G128A-F | CATTAGCCATCAC <u>GCTA</u> AGGTGCTGGCGGTG    | 31             | 69.35                  |
| G128A-R | CACCGCCAGCACCTT <u>AGCGT</u> GATGGCTAATG    | 31             | 69.35                  |
| G157A-F | CGCTTCGACTACGAC <u>GCT</u> CAAGTTACCAGCC    | 31             | 69.35                  |
| G157A-R | GGCTGGTAACTTG <u>AGCGT</u> CGTAGTCGAAGCG    | 31             | 69.35                  |
| G290A-F | GAATGCTTGGAAGTC <u>GCT</u> ACCAAGATTTATATC  | 34             | 64.14                  |
| G290A-R | GATATAAATCTTGGT <u>AGCGA</u> CTCCCAAGCATTC  | 34             | 64.14                  |
| G398A-F | GGGACAACCACCGAG <u>GCT</u> ACTACGACCTCTGG   | 32             | 71.78                  |
| G398A-R | CCAGAGGTCGTAGTC <u>CAGCT</u> CGGTGGTTGTCCC  | 32             | 71.78                  |
| K35R-F  | GACGGCGAAATCCCA <u>AGG</u> TCAATAAATGGAACG  | 33             | 66.60                  |
| K35R-R  | CGTTCCATTTATTGAC <u>CTT</u> GGGATTTTCGCCGTC | 33             | 66.60                  |
| K54R-F  | CAAGTTACCCCGCAAAGGTTCCACACCTTCATAG          | 34             | 67.75                  |
| K54R-R  | CTATGAAGGTGTGGAACCTTTGCGGGGTAACCTG          | 34             | 67.75                  |
| K83R-F  | CATCAGTCGCTGGGTT <u>AGG</u> ACCGCTCGATTCACG | 34             | 71.37                  |
| K83R-R  | CGTGAATCGAGCGGT <u>CCTA</u> ACCCAGCGACTGATG | 34             | 71.37                  |
| K95R-F  | GAACGACTAGCGCGA <u>AGAT</u> CGCTATTTGGCATG  | 33             | 67.84                  |
| K95R-R  | CATGCCAAATAGCGAT <u>CTT</u> TCGCGCTAGTCGTTT | 33             | 67.84                  |
| K112R-F | GACGACACCAGTGTAAGAGGACTAGACCGCACC           | 33             | 70.32                  |
| K112R-R | GGTGCGGTCTAGTCCTCTTACACTGGTGTCGTC           | 33             | 70.32                  |
| K185R-F | CTTCGGTTCGGCAGCT <u>AGGG</u> GCGAAGCAACTCC  | 33             | 72.81                  |
| K185R-R | GGAGTTGCTTCGCC <u>CCT</u> AGCTGCCGAACCGAAG  | 33             | 72.81                  |
| K199R-F | CTATTACATTGTCGAC <u>AGAC</u> ACGGCAAGGTGAC  | 33             | 66.60                  |
| K199R-R | GTCACCTTGCCGTG <u>TCT</u> GTCGACAATGTAATAG  | 33             | 66.60                  |
| K202R-F | GTCGACAAGCACGGC <u>AGAG</u> TGACACATGAAAC   | 32             | 67.93                  |
| K202R-R | GTTTCATGTGTCAC <u>TCT</u> GCCGTGCTTGTCGAC   | 32             | 67.93                  |
| K242R-F | GCCTGTCCCGCCTC <u>AGAG</u> GCGAAACAGCC      | 28             | 71.29                  |
| K242R-R | GGCTGTTTCGCT <u>CTG</u> AGGCGGGACAGGC       | 28             | 71.29                  |
| K244R-F | CCCGCCTCAAGGCG <u>AGAC</u> AGCCAATTTATATG   | 32             | 67.93                  |
| K244R-R | CATATAAATTGGCTG <u>TCT</u> CGCCTTGAGGCGGG   | 32             | 67.93                  |
| K274R-F | CAGATTCGCTGGCTC <u>AGGG</u> CACCGGCGCTCTGG  | 33             | 75.29                  |
| K274R-R | CCAGAGCGCCGGTGCC <u>CTG</u> AGCCAGCGAATCTG  | 33             | 75.29                  |
| K319R-F | CCCTTCGCCCCCTGAG <u>AGAG</u> CCGTACCACGCCTG | 33             | 75.29                  |
| K319R-R | CAGGCGTGGTACGGC <u>TCT</u> CTCAGGGGCGAAGGG  | 33             | 75.29                  |
| K339R-F | GCAGCGACGAGATC <u>AGGC</u> GAACCCGGCTACAC   | 32             | 73.06                  |
| K339R-R | GTGTAGCCGGGTTTCG <u>CCT</u> GATCTCGTCGCTGC  | 32             | 73.06                  |
| K383R-F | CATCAGCAGGCCGAGAGAATATTTGCGTACAAC           | 33             | 66.60                  |
| K383R-R | GTTGTACGCAAATATTCTCTCGGCCTGCTGATG           | 33             | 66.60                  |



|         |                                     |    |       |
|---------|-------------------------------------|----|-------|
| V130L-F | GCCATCACGGCAAGCTGCTGGCGGTGAAGGAAG   | 33 | 72.81 |
| V130L-R | CTTCCTTCACCGCCAGCAGCTTGCCGTGATGGC   | 33 | 72.81 |
| S182Y-F | CTTGTTGTTCTTCGGTTACGCAGCTAAGGGCGAAG | 35 | 68.84 |
| S182Y-R | CTTCGCCCTTAGCTGCGTAACCGAAGAACAACAAG | 35 | 68.84 |
| L303N-F | GGAAAGTGAAATCAATCCGTTCCCCTTCCCC     | 31 | 66.71 |
| L303N-R | GGGGAAGGGGAACGGATTGATTTCACTTTCC     | 31 | 66.71 |
| I352R-F | CTTTGCGGAAATGCCACGCATGGATTTTCGCTTC  | 34 | 67.75 |
| I352R-R | GAAGCGAAAATCCATGCGTGGCATTTCGCAAAG   | 34 | 67.75 |
| D176E-F | GACCCGGAAACGGGTGAGTTGTTGTTCTTCGG    | 32 | 69.21 |
| D176E-R | CCGAAGAACAACAACCTCACCCGTTTCCGGGTC   | 32 | 69.21 |
| N312G-F | CTTCCCCAACTCACAAGGTCAACCCTTCGCCCCTG | 35 | 72.36 |
| N312G-G | CAGGGGCGAAGGGTTGACCTTGTGAGTTGGGGAAG | 35 | 72.36 |
| F216M-F | CAGCCCTATGGCGCAATGATGCACGACTTTGCC   | 33 | 70.32 |
| F216M-R | GGCAAAGTCGTGCATCATTGCGCCATAGGGCTG   | 33 | 70.32 |
| L273F-F | GTCAGATTCGCTGGTTCAAGGCACCGGCGCTC    | 32 | 71.78 |
| L273F-R | GAGCGCCGGTGCCTTGAACCAGCGAATCTGAC    | 32 | 71.78 |
| E47D-F  | CTACCGTAATACGCCAGACCCTCAAGTTACCCCG  | 34 | 70.16 |
| E47D-R  | CGGGGTAACCTTGAGGGTCTGGCGTATTACGGTAG | 34 | 70.16 |

---

\*Mutated bases were underlined.
